# Supplementary material for: Association between the dietary index for gut microbiota and heart failure: NHANES 2007-2018
Source: Research Square preprint supplement (doi:10.21203/rs.3.rs-6861182/v1), 2025-08-01
Supplement: Supplementary file 1 [file 0588a4fa41b54f94dad118cd.docx]

**Table S1 Components and scoring criteria of DI-GM.**

| **Components of DI-GM** | **Food items** | **Scoring criteria** |
| --- | --- | --- |
| **Beneficial to gut microbiota** | | |
| Avocados | Avocados | Score 1 - Consumption ≥ sex-specific median  Score 0 - Otherwise |
| Broccoli | Broccoli |
| Chickpeas | Chickpeas |
| Coffee | Coffee |
| Cranberries | Cranberries |
| Fermented dairy | Yogurt, cheese, kefir, sour cream, buttermilk |
| Fiber | Not applicable |
| Green tea | Green tea |
| Soybeans | Soy products—Soy milk, Tofu |
| Whole grains | Grains defined as whole grains, containing the entire grain kernel―the bran, germ, and endosperm |
| **Unfavorable to gut microbiota** | | |
| High-fat diets  (% energy) | Not applicable | Score 0 - Consumption ≥ 40%  Score 1 - Otherwise |
| Processed meats | Frankfurters, sausages, corned beef, and luncheon meat that are made from beef, pork, or poultry | Score 0 - Consumption ≥ sex-specific median  Score 1 - Otherwise |
| Red meat | Beef, veal, pork, lamb, and game meat; excludes organ meat and cured meat |
| Refined grains | Refined grains that do not contain all of the components of the entire grain kernel |

Abbreviations: DI-GM, dietary index for gut microbiota; NHANES, National Health and Nutrition Examination Survey.
