# Supplementary material for: Association between the dietary index for gut microbiota and heart failure: NHANES 2007-2018
Source: Research Square preprint supplement (doi:10.21203/rs.3.rs-6861182/v1), 2025-08-01
Supplement: Supplementary file 2 [file 313c4be0959153a89ad9818c.docx]

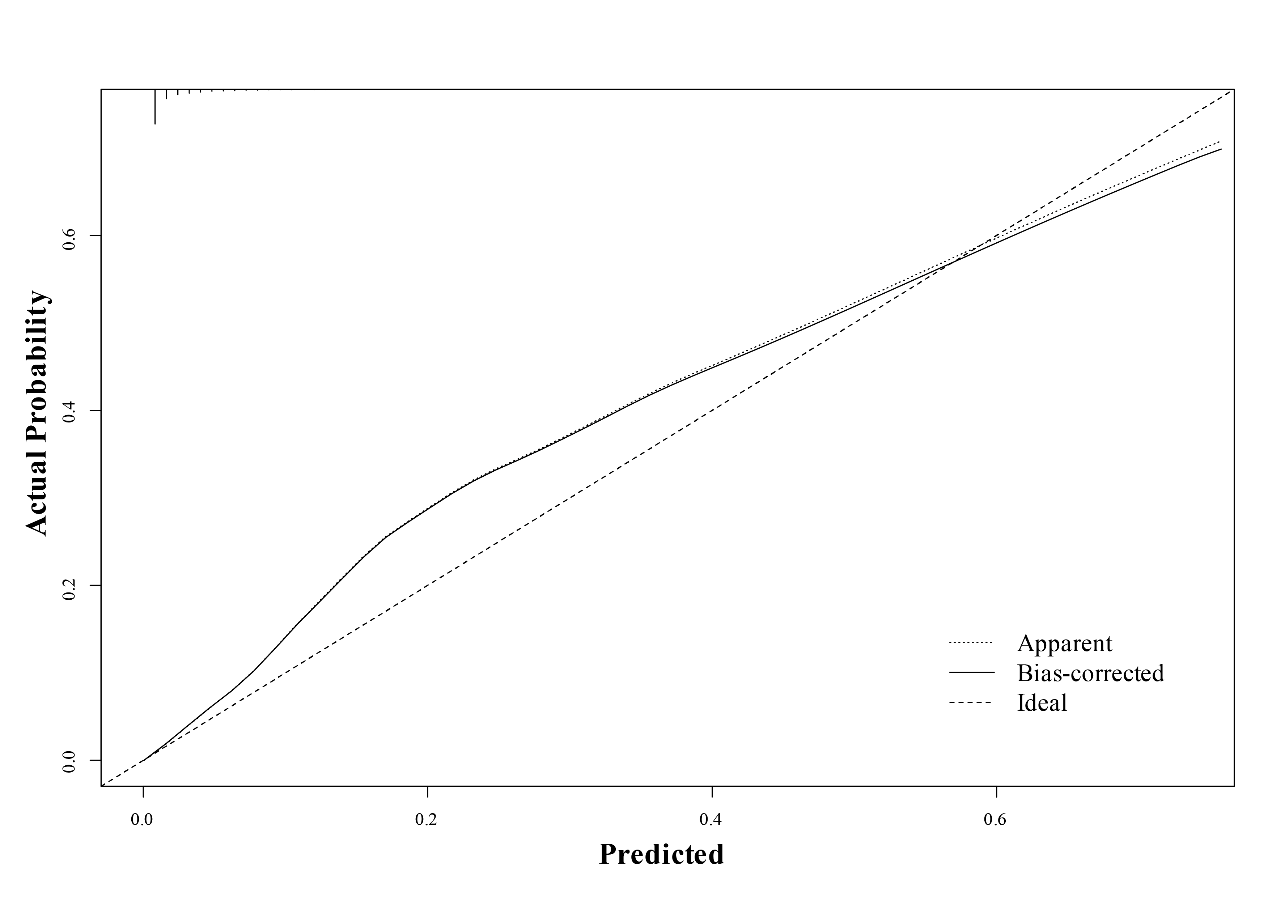
**Figure S1 Calibration curves. Solid lines indicate bias-corrected predictions, gray dashed lines indicate apparent predictions, and black dashed lines indicate ideal predictions.**
