# Supplementary material for: Association between the dietary index for gut microbiota and heart failure: NHANES 2007-2018
Source: Research Square preprint supplement (doi:10.21203/rs.3.rs-6861182/v1), 2025-08-01
Supplement: Supplementary file 3 [file 50b1cefcd78c99e80879857a.docx]

**Table S4 ROC analysis of DI-GM and model diagnostic performance for HF. The model is based on DI-GM, age, marital status, PIR, BMI, TC, smoking status, hypertension, diabetes and CHD were adjusted.**

|  | AUC (95% CI) | Accuracy (95% CI) | Sensitivity (95% CI) | Specificity (95% CI) | PPV (95% CI) | NPV (95% CI) | Cut off |
| --- | --- | --- | --- | --- | --- | --- | --- |
| DI-GM | 0.636 (0.618-0.654) | 0.567 (0.561-0.572) | 0.564 (0.559-0.570) | 0.638 (0.607-0.668) | 0.979 (0.977-0.981) | 0.046 (0.042-0.049) | 0.030 |
| Model | 0.891 (0.881-0.900) | 0.795 (0.790-0.799) | 0.794 (0.789-0.799) | 0.819 (0.795-0.843) | 0.993 (0.991-0.994) | 0.116 (0.108-0.123) | 0.033 |
