# Supplementary material for: Association between the dietary index for gut microbiota and heart failure: NHANES 2007-2018
Source: Research Square preprint supplement (doi:10.21203/rs.3.rs-6861182/v1), 2025-08-01
Supplement: Supplementary file 4 [file 8a2645b46a6b7b59c72226c2.docx]

**Table S3 Lasso regression analysis results for HF (best log(λ) = -5.3504).**

| **Characteristic** | **r** | **Characteristic** | **r** |
| --- | --- | --- | --- |
| Gender | / | Waist circumference | / |
| Age | 0.3105 | Physical activity | / |
| Race | / | Alcohol consumption | / |
| Marital status | 0.0397 | Smoking status | -0.0158 |
| PIR | -0.1150 | Hypertension | -0.6487 |
| Education level | / | Diabetes | 0.4577 |
| BMI | 0.0232 | CHD | -2.2225 |
| TC | -0.0848 |  |  |

Abbreviations: PIR, poverty income ratio; BMI: body mass index; TC, total cholesterol; CHD, coronary heart disease.
