# Supplementary material for: Association between the dietary index for gut microbiota and heart failure: NHANES 2007-2018
Source: Research Square preprint supplement (doi:10.21203/rs.3.rs-6861182/v1), 2025-08-01
Supplement: Supplementary file 5 [file 9993c07a22e9319903c1bd97.docx]

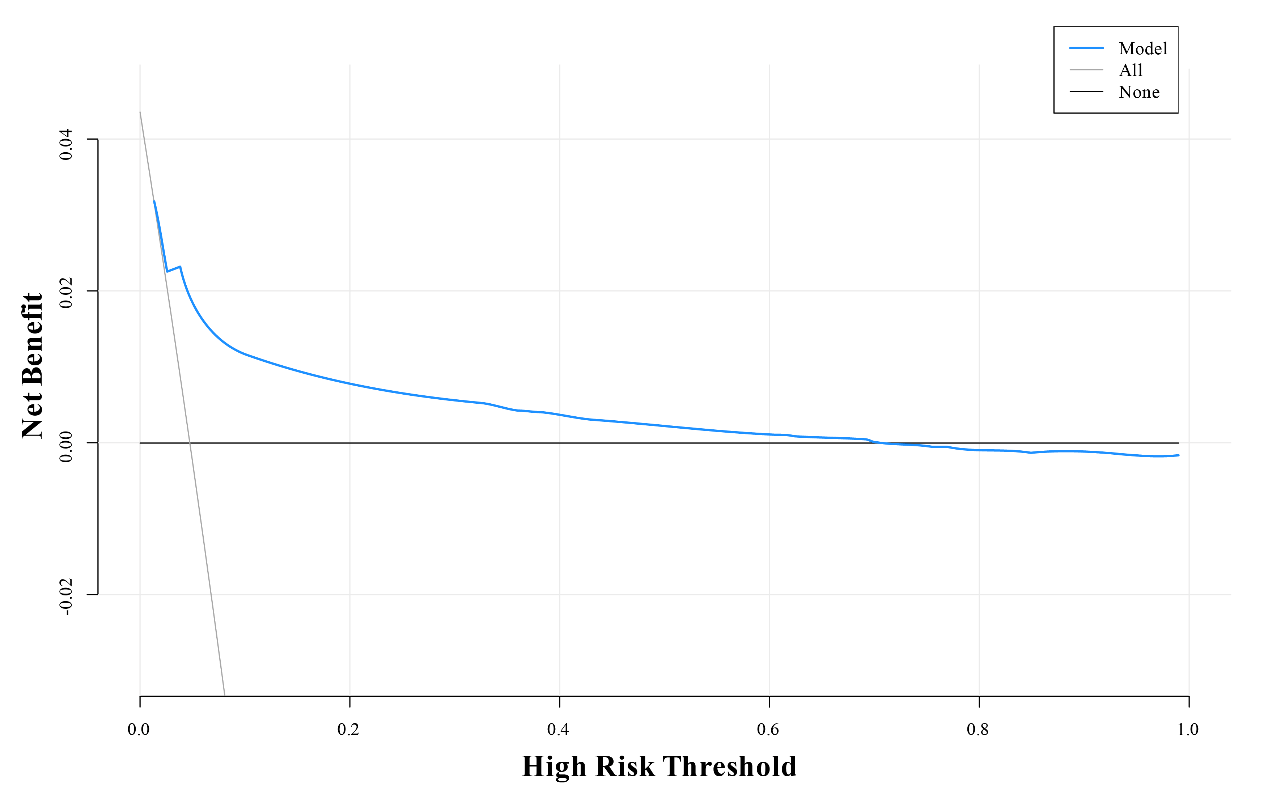


**Figure S2 Decision curve analysis (DCA). The blue line indicates the net benefit of the predictive model. The black line indicates that the predictive model was not used.**
