# Supplementary material for: Association between the dietary index for gut microbiota and heart failure: NHANES 2007-2018
Source: Research Square preprint supplement (doi:10.21203/rs.3.rs-6861182/v1), 2025-08-01
Supplement: Supplementary file 6 [file b1df4fe08b4ad566e432dd96.docx]

**Table S2 Association with scores of individual components of the DI-GM of the odds of HF.**

| **Characteristic** | **Model****1a** | | **Model 2****b** | | **Model 3 c** | |
| --- | --- | --- | --- | --- | --- | --- |
| **OR (95% CI)** | **P-value** | **OR (95% CI)** | **P-value** | **OR (95% CI)** | **P-value** |
| **Beneficial to gut microbiota** |  |  |  |  |  |  |
| Avocados | 0.99 (0.99, 0.99) | **<0.001** | 0.99 (0.99, 0.99) | **0.028** | 1.00 (0.99, 1.00) | 0.176 |
| Broccoli | 0.99 (0.99, 0.99) | **<0.001** | 0.99 (0.99, 0.99) | **0.006** | 1.00 (1.00, 1.00) | 0.204 |
| Chickpeas | 0.99 (0.99, 0.99) | **0.027** | 0.99 (0.99, 1.00) | 0.115 | 1.00 (0.99, 1.00) | 0.305 |
| Coffee | 1.00 (1.00, 1.00) | 0.121 | 1.00 (1.00, 1.00) | 0.069 | 0.99 (0.99, 1.00) | **0.018** |
| Cranberries | 1.00 (1.00, 1.00) | 0.142 | 1.00 (1.00, 1.00) | 0.548 | 1.00 (1.00, 1.00) | 0.769 |
| Fermented dairy | 0.99 (0.99, 0.99) | **<0.001** | 1.00 (1.00, 1.00) | 0.144 | 1.00 (1.00, 1.00) | 0.225 |
| Fiber | 0.97 (0.97, 0.98) | **<0.001** | 0.97 (0.97, 0.98) | **<0.001** | 0.98 (0.98, 0.99) | **<0.001** |
| Soybeans | 1.00 (1.00, 1.00) | 0.051 | 1.00 (1.00, 1.00) | 0.171 | 1.00 (1.00, 1.00) | **0.706** |
| Whole grains | 0.97 (0.92, 1.02) | 0.269 | 0.89 (0.84, 0.95) | **<0.001** | 0.92 (0.87, 0.98) | **0.008** |
| **Unfavorable to gut microbiota** |  |  |  |  |  |  |
| Refined grains | 0.93 (0.91, 0.94) | **<0.001** | 0.98 (0.96, 1.00) | 0.060 | 0.98 (0.95, 0.99) | **0.031** |
| Processed meats | 1.04 (1.01, 1.07) | **0.020** | 1.06 (1.02, 1.10) | **0.002** | 1.03 (0.99, 1.07) | 0.118 |
| Red meat | 0.99 (0.97, 1.01) | 0.475 | 1.02 (1.00, 1.04) | 0.118 | 1.02 (0.99, 1.04) | 0.262 |
| High-fat diets | 0.99 (0.99, 0.99) | **<0.001** | 0.99 (0.99, 0.99) | **<0.001** | 0.99 (0.99, 0.99) | **0.007** |

OR: Odds ratio.

95% CI: 95% confidence interval.

a Model 1: No covariates were adjusted.

b Model 2: Adjusted for gender, age, and race.

c Model 3: Adjusted for gender, age, race, education level, marital status, PIR, BMI, waist circumference, smoking status, alcohol consumption, TC, diabetes, hypertension, CHD, physical activity.

Abbreviations: DI-GM, dietary index for gut microbiota; PIR, poverty income ratio; BMI, body mass index; TC, total cholesterol; CHD, coronary heart disease.
